# Supplementary material
Source: ML conference proceedings conference paper supplement (https://openaccess.thecvf.com/content/ICCV_2017/html/Yu_Cross-View_Asymmetric_Metric_ICCV_2017_paper.html)
Supplement: Supplementary file 1 [file Yu_Cross-View_Asymmetric_Metric_ICCV_2017_supplemental.pdf]

# Supplementary for “Cross-view Asymmetric Metric Learning for Unsupervised Person Re-identification”

Hong-Xing Yu<sup>1</sup>, Ancong Wu<sup>2</sup>, and Wei-Shi Zheng<sup>1,3\*</sup>

<sup>1</sup>School of Data and Computer Science, Sun Yat-sen University, China

<sup>2</sup>School of Electronics and Information Technology, Sun Yat-sen University, China

<sup>3</sup>Key Laboratory of Machine Intelligence and Advanced Computing, Ministry of Education, China

xKoven@gmail.com, wuancong@mail2.sysu.edu.cn, wszheng@ieee.org

## 1. Gradual Stages of CAMEL

Figure 1 shows how CAMEL learns the shared space by degree. Note that from the original stage to the middle stage 1, the distribution changes greatly. This is because the close-form solution produces a “sharp” change of the transformation matrices: equivalently, the original feature is transformed by a universal identity matrix  $I$ , and in middle stage 1 the feature is transformed by the learned view-specific transformations. Then, the following stages gradually reduce the view-specific bias while rotating and translating, because the changes in the learned transformations are not so great as the first iteration.

---

\*Corresponding author

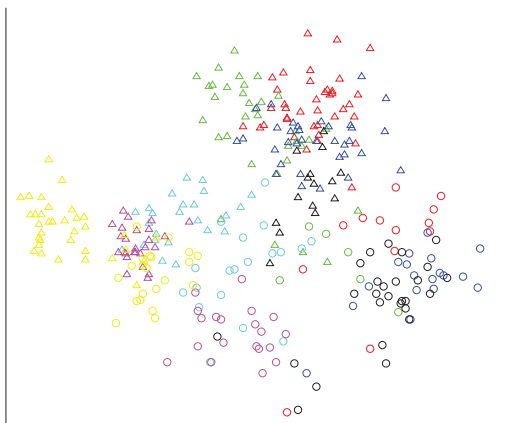

(a) Original distribution

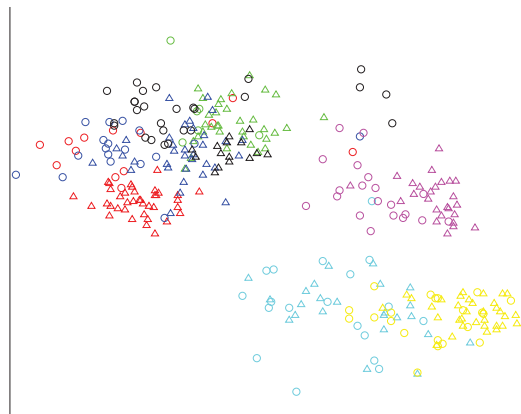

(b) Middle stage 1

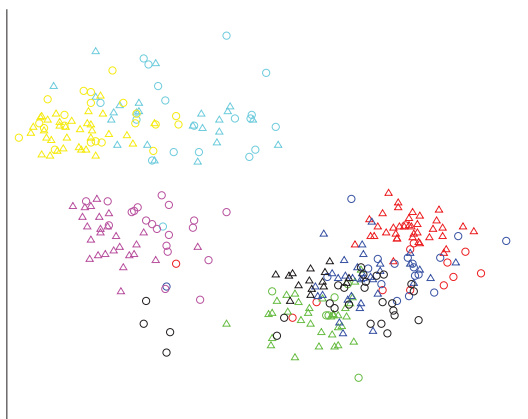

(c) Middle stage 2

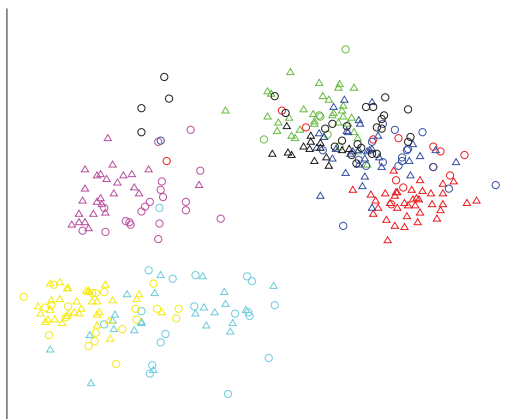

(d) Middle stage 3

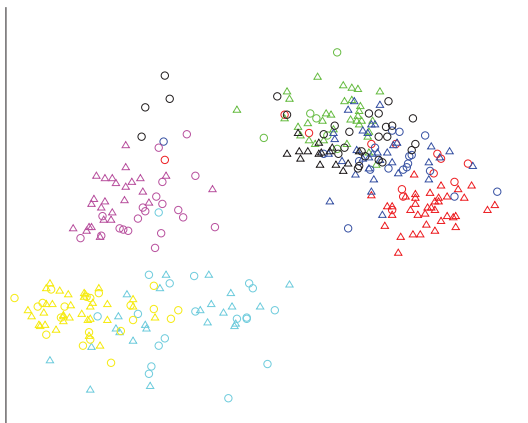

(e) Convergence

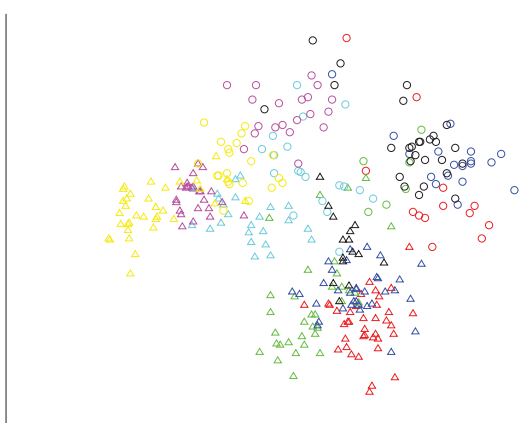

(f) Symmetric one

Figure 1. Illustration of how symmetric and asymmetric metric clustering structure data using our method for the unsupervised RE-ID problem. One shape (triangle or circle) stands for samples from one view, while one color indicates samples of one person. (a) Original distribution (b)-(e) Gradual stages (f) Distribution in the space learned by symmetric metric clustering. (Best viewed in color)
